# Supplementary material
Source: PubMed Central journal article supplement (PMC6125221)
Supplement: NIHMS1500077-supplement-JNE_15_5_054001_suppdata_pdf.pdf [file NIHMS1500077-supplement-JNE_15_5_054001_suppdata_pdf.pdf]

**Electric Field Measurement of Two Commercial Active/Sham Coils  
for Transcranial Magnetic Stimulation**

**Supplementary Material**

J. Evan Smith and Angel V. Peterchev

*Journal of Neural Engineering*

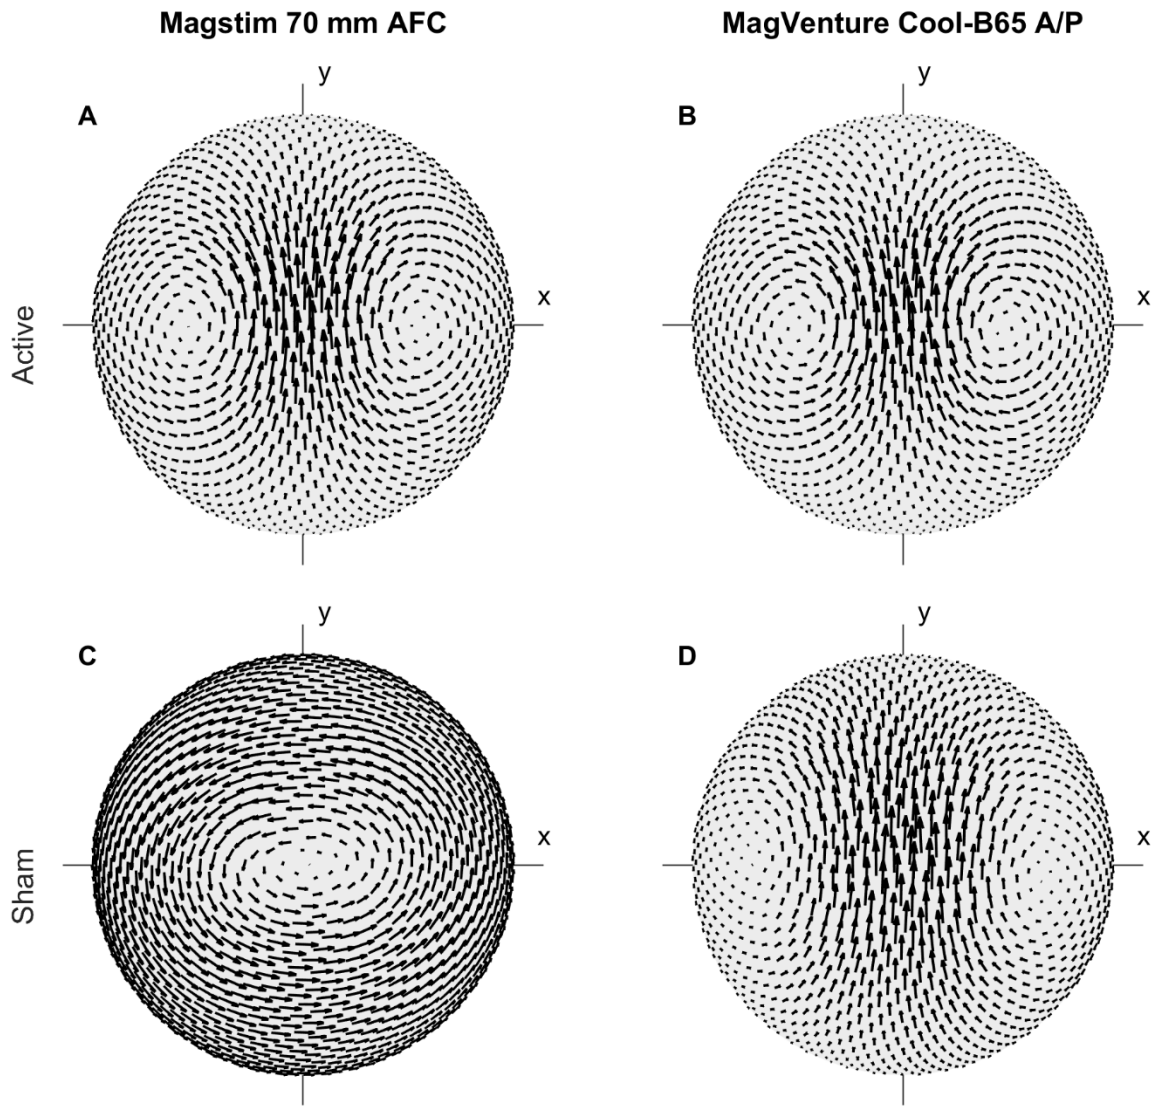

**Figure S1.** Measured E-field distributions for the active and sham coil configurations. Similar to figure 1A–D in the main text, but here the distribution for each coil is normalized by its maximum E-field strength.

## Raw Data

Spreadsheet file 'Smith\_Peterchev\_2018\_E-field\_DATA.xls' provides the raw E-field measurements. The dataset is comprised of 1000 rows, each corresponding to a point on the 1000 point, hemispherical sample grid.

The location of each sample (row) in 3-space is defined by the first three columns (1-3) with rectangular coordinates for dimensions x, y, and z, respectively, in centimeters (cm). In every case, the yz-plane ( $x = 0$ ) separated each side (loop) of the figure-8 coils with symmetry, and the inferior surface of the coils was fixed at  $z \sim 8.5$  cm.

Columns 4-15 define the E-field vector components along the x, y, and z dimensions for the active and sham Magstim and MagVenture coil configurations, respectively, at the points defined in columns 1-3. The columns corresponding to each condition are: Magstim active (4-6), Magstim sham (7-9), MagVenture active (10-12), and MagVenture sham (13-15). The values in columns 4-15 were measured at 50% of maximum stimulator amplitude and are reported in V/m.
